# Supplementary material for: A high temperature optic-electric duple switching organic ionic compound: 1,4,7-triazoniacyclononane tetrafluoroborate dichloride
Source: Royal Society of Chemistry journal article supplement (doi:10.1039/c9tc01661a), 2019-01-01
Supplement: c9tc01661a1.pdf [file c9tc01661a1.pdf]

# Supporting Information

## A high temperature optic-electric duple switching organic ionic compound: 1,4,7-Triazoniacyclononane tetrafluoroborate dichloride †

Ji-Xing Gao,<sup>a</sup> Xiu-Ni Hua,<sup>a</sup> Xiao-Gang Chen<sup>a</sup> and Wei-Qiang Liao<sup>\*ab</sup>

<sup>a</sup> Jiangsu Key Laboratory for Science and Applications of Molecular Ferroelectrics, Southeast University, Nanjing, 211189, P. R. China.

E-mail: weiqiangliao@seu.edu.cn

<sup>b</sup> Ordered Matter Science Research Center, Nanchang University, Nanchang, 330031, P. R. China

### Synthesis.

A solution containing 1,4,7-triazacyclononane (119.3 mg, 0.50 mmol) and tetrafluoroboric acid (40.0 %, 109.8 mg, 0.50 mmol) in water (1.0 mL) was prepared and left to slowly evaporate. After several days colourless crystals of **1**, [9-tacn-3]<sup>3+</sup>[BF<sub>4</sub>]<sup>-</sup>·2[Cl]<sup>-</sup> (9-tacn-3 = 1,4,7-Triazoniacyclononane), were obtained (yield ~ 117.4 mg, 81.0 %). Microanalysis (%) Found: C 25.2; H 6.7; N 13.9. Calc. for C<sub>6</sub>H<sub>18</sub>N<sub>3</sub>Cl<sub>2</sub>BF<sub>4</sub>: C 24.9; H 6.3; N 14.5. IR bands  $\nu$  (KBr disk, cm<sup>-1</sup>): 3455 w, 2946 s, 2823 s, 2765 s, 2617 m, 2461 w, 2374 w, 2071 w, 1812 w, 1611 m, 1587 m, 1462 m, 1450 m, 1423 m, 1404 m, 1387 m, 1298 w, 1111 s, 1084 s, 1060 s, 1032 s, 981 m, 932 m, 876 w, 785 w, 527 m, 486 m.

**Single-crystal X-ray crystallography.** Variable-temperature X-ray single-crystal diffraction data at 298 and 413 K were collected on a *Rigaku Varimax<sup>TM</sup> DW* diffractometer with *Mo-K $\alpha$*  radiation ( $\lambda = 0.71073$  Å) by using four-circle measurement method. The *Hypix-6000HE* detector and Crystalclear software package (*Rigaku OD*, 2018) was used for collection of diffraction data and data processing including empirical absorption corrections, respectively. The structures were solved by direct methods and refined by the fullmatrix method based on  $F^2$  using the SHELXLTL software package. All nonhydrogen atoms were refined anisotropically using all reflections with  $I > 2\sigma(I)$ . The positions of the hydrogen atoms were generated geometrically and refined using a "riding" model with  $U_{iso} = 1.2U_{eq}$  (C and N). The molecular structures and the packing views were drawn with *DIAMOND* (Brandenburg and Putz, 2005). Angles and distances between some atoms were carried out using *DIAMOND*, and other calculations were calculated using *SHELXLTL*. Crystallographic data and structure refinement at 298 and 413 K are list in Table S2.

**Physical measurements.** IR spectra were recorded at ambient temperature using a Shimadzu model IR-60 spectrometer with KBr pellets. DSC (Differential scanning calorimetry) was carried out on a Perkin-Elmer Diamond DSC instrument by heating and cooling the polycrystalline samples (21.5 mg) with a heating rate of 10 K min<sup>-1</sup> in aluminum crucibles under nitrogen at atmospheric pressure. VT-SHG (variable-temperature second harmonic generation) experiments were executed at a

heating/cooling rate of 10 K min<sup>-1</sup> in the temperature ranges of 210-360 K, by Kurtz-Perry powder SHG test using an unexpanded laser beam with low divergence (pulsed Nd:YAG at a wavelength of 1064 nm, 5 ns pulse duration, 1.6 MW peak power, 10 Hz repetition rate). The instrument model is Ins 1210058, INSTEC Instruments, while the laser is Vibrant 355 II, OPOTEK. The numerical values of the nonlinear optical coefficients for SHG have been determined by comparison with a KDP (KH<sub>2</sub>PO<sub>4</sub>, potassium dihydrogen phosphate) reference. The pressed-powder pellet sandwiched between two parallel (0.64 mm thick and 6.65 mm<sup>2</sup> in area) copper electrodes was used for dielectric constant measurements. Complex dielectric permittivity  $\varepsilon$  ( $\varepsilon = \varepsilon' - i\varepsilon''$ ) was measured on a Tonghui TH2828A instrument at a heating/cooling rate of 10 K min<sup>-1</sup> in the temperature range between 300 and 440 K with an applied voltage of 1 V.

**Calculation of  $\Delta S$  and  $N$  for Compound 1.** According to the Boltzmann equation,  $\Delta S = nR \ln(N)$ , where  $\Delta S$  is calculated from the measured enthalpy changes during the phase transitions at  $T_C$ ,  $n$  is the number of guest molecules per mole ( $n = 1$ , here),  $R$  is the gas constant, and  $N$  is the number of possible orientations for the disordered system. The calculations of  $\Delta S$  and  $N$  of **1** are as follows.

$$\begin{aligned} \Delta S &= \int_{T_1}^{T_2} \frac{Q}{T} dT \\ &\approx \frac{\Delta H}{T_C} \\ &= \frac{28.21 \text{ J} \cdot \text{g}^{-1} \times 289.94 \text{ g} \cdot \text{mol}^{-1}}{400.00 \text{ K}} \\ &= 20.45 \text{ J} \cdot \text{mol}^{-1} \cdot \text{K}^{-1} \\ \Delta S &= R \ln N \\ N &= \exp\left(\frac{\Delta S}{R}\right) = \exp\left(\frac{20.45 \text{ J} \cdot \text{mol}^{-1} \cdot \text{K}^{-1}}{8.314 \text{ J} \cdot \text{mol}^{-1} \cdot \text{K}^{-1}}\right) \\ &= 11.69 \end{aligned}$$

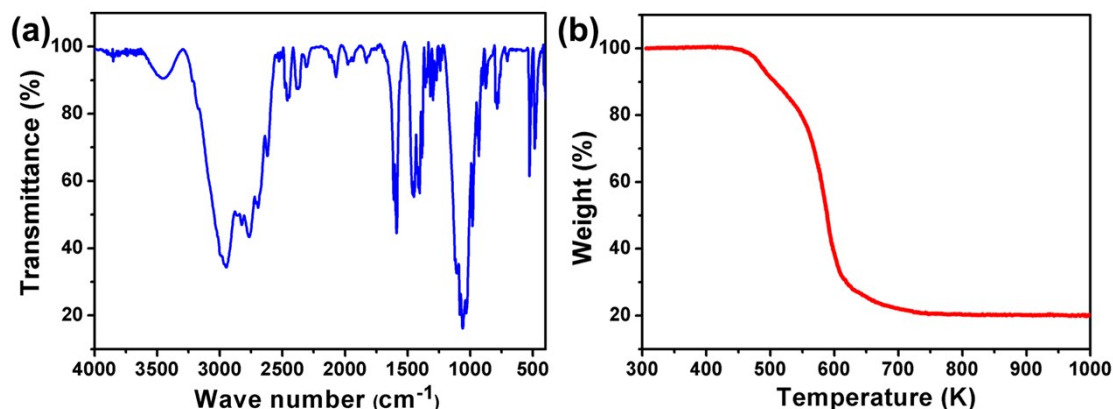

Fig. S1 (a) IR (Infrared spectrum) of **1** at room temperature and (b) TGA (Thermogravimetric Analysis) curve of **1**.

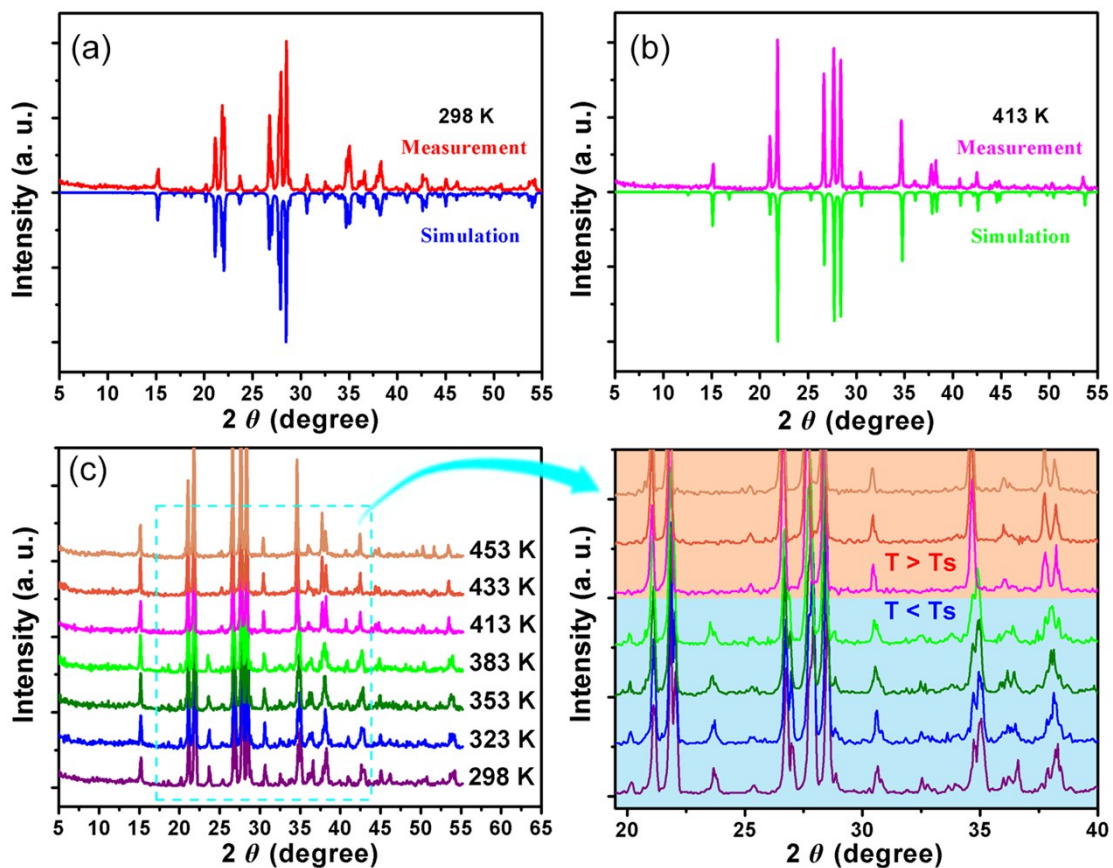

Fig. S2. PXRD (Powder X-Ray Diffraction) spectra of **1** at 298 K (a) and 413 K (b) and VT-PXRD (variable-temperature PXRD) spectra (c) at different temperature.

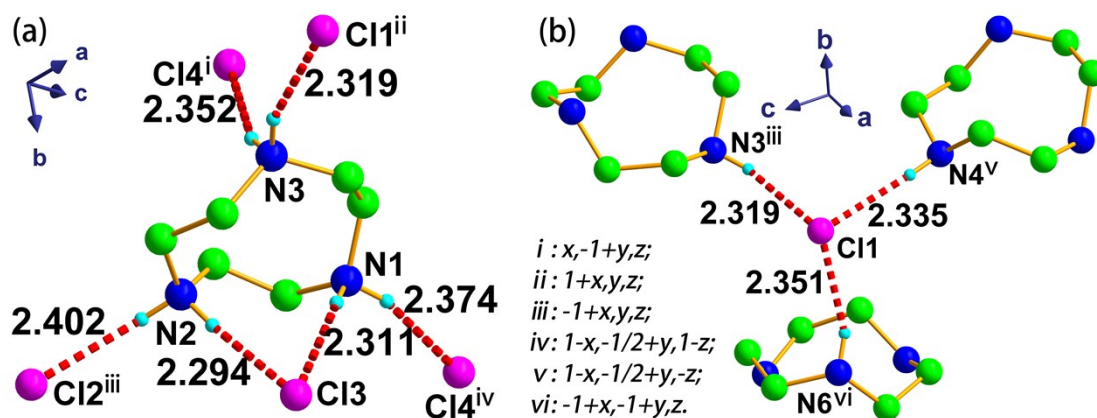

Fig. S3 Hydrogen bonds environment of the cation (a) and anion (b) of **1** at 298K.

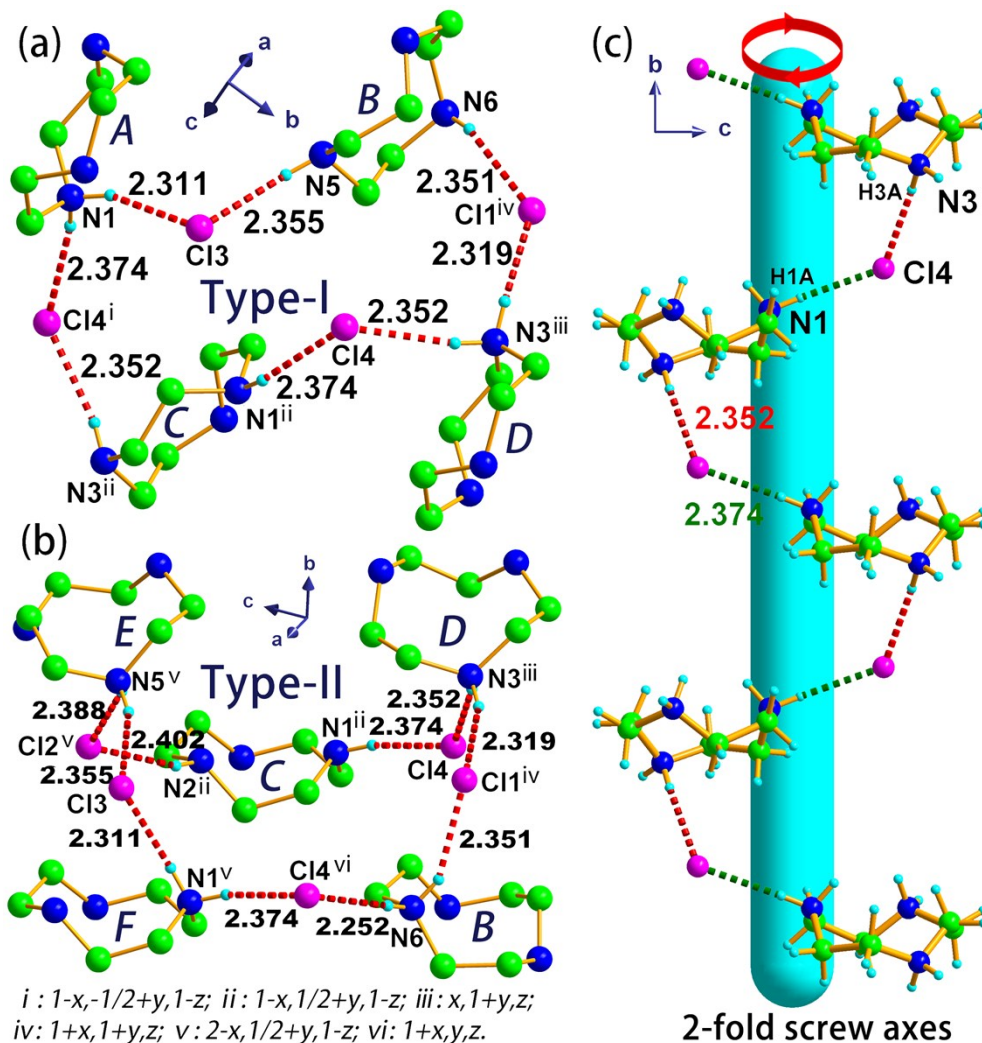

Fig. S4 Hydrogen-bonding interactions (red and green dashed lines) between the cation and anion moieties of **1** at 298K. Formed type-I (a) and type-II (b) cyclic structures and spiral chains (c).

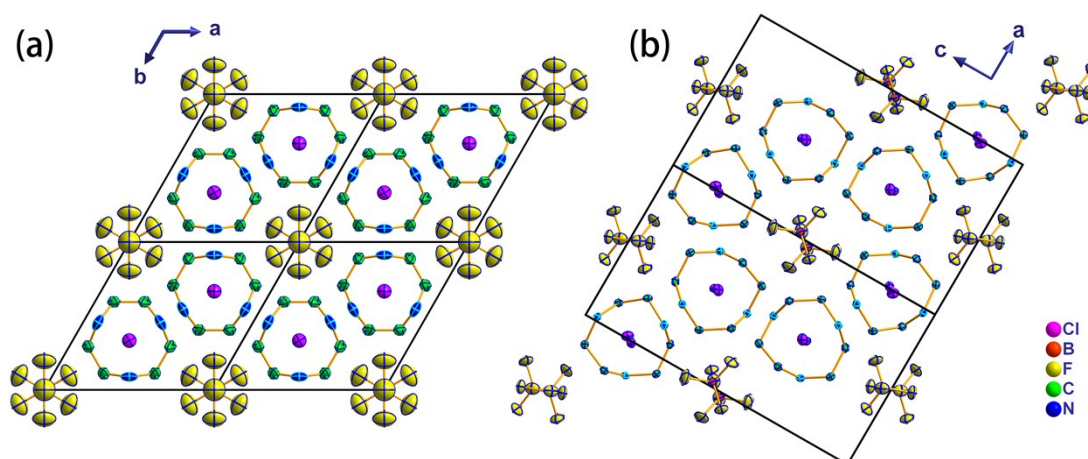

Fig. S5 View of the packing structure of **1** obtained at 298 K (a) and 413 K (b) showing the atomic numbering scheme. Displacement ellipsoids are drawn at the 30% probability level. H atoms of cations are labeled for clearly.



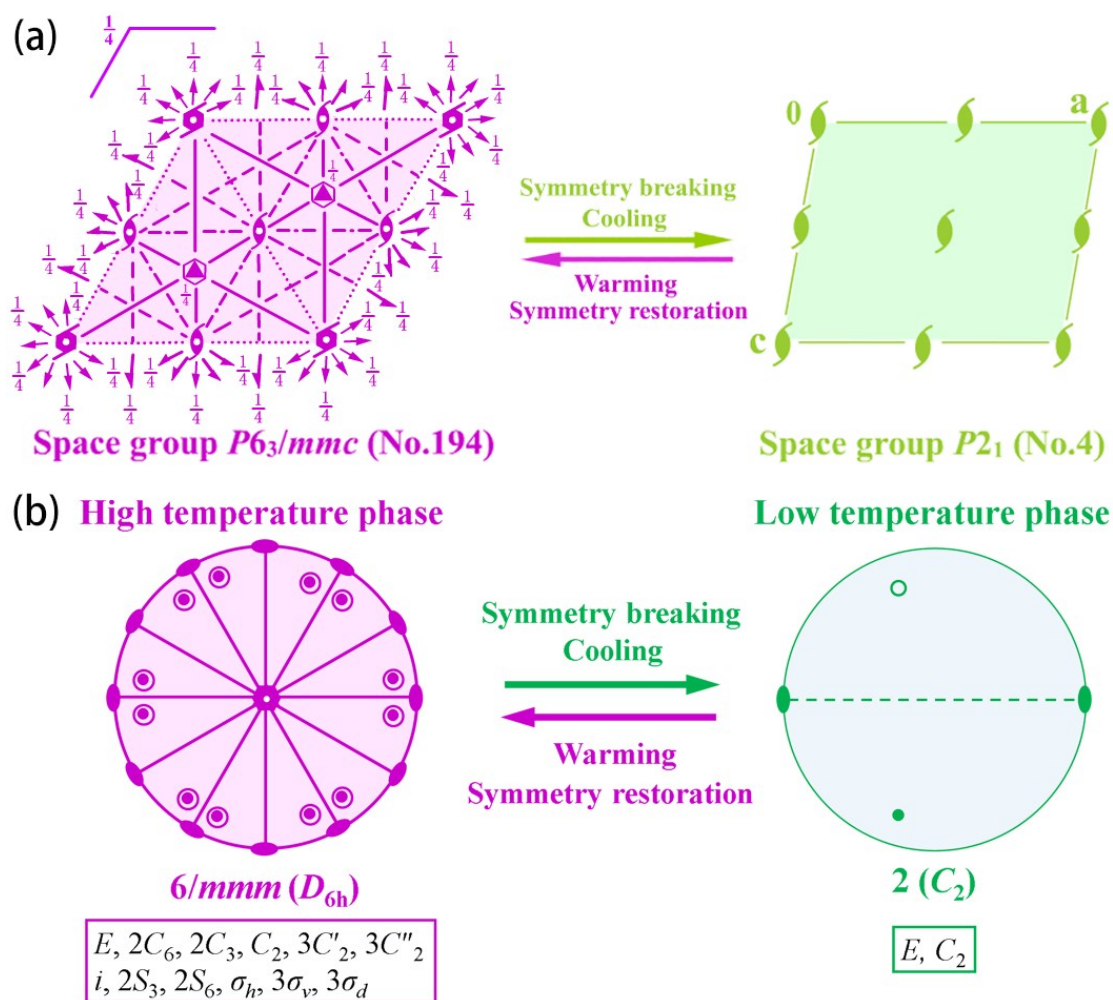

Fig. S6 (a) Spatial symmetry operation change of **1** from the HTP ( $P6_3/mmc$ ) to the LTP ( $P2_1$ ). (b) Equatorial plane projection of point groups  $6/mmm (D_{6h})$  in the HTP and  $2 (C_2)$  in the LTP.

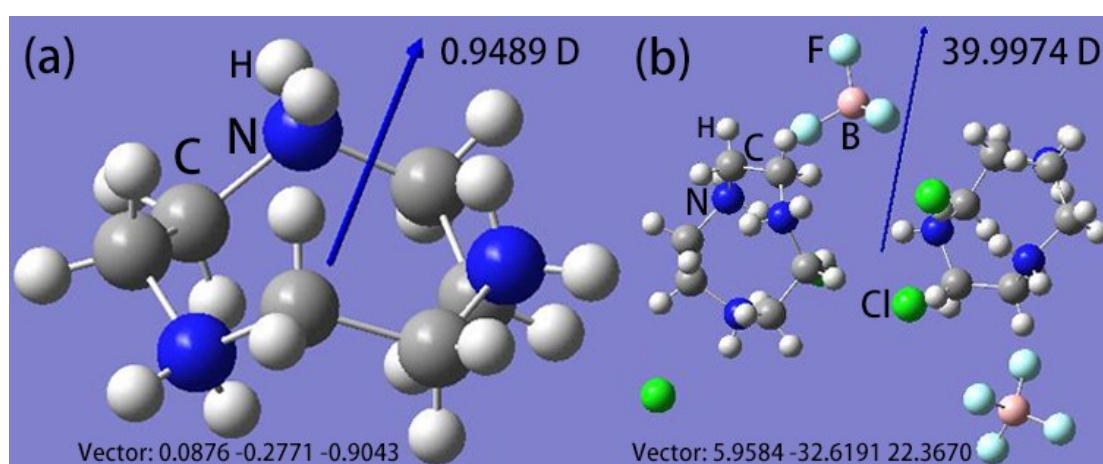

Fig. S7 Dipole moment direction and magnitude of  $[9\text{-tacn-3}]^{3+}$  (a) and **1** (b) at 298 K was calculated through GaussView 5.0.9 software.

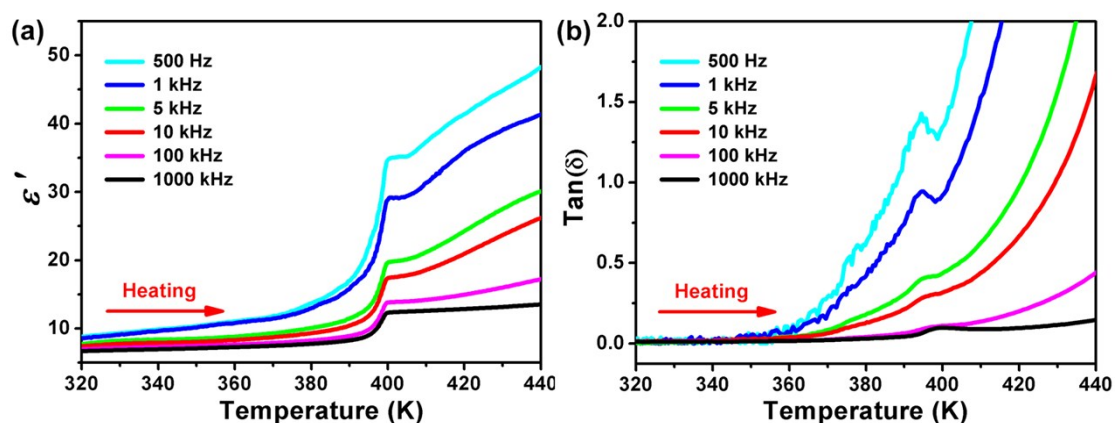

Fig. S8 Temperature-dependence of the real part ( $\epsilon'$ ) (a) and dielectric loss ( $\tan(\delta)$ ) (b) of the polycrystalline sample of **1** at different frequency.

Table S1 List of some classical phase transition materials.

| Formula                                           | $T_C$ (K) | Symmetry Changes                              | Year       | Ref |
|---------------------------------------------------|-----------|-----------------------------------------------|------------|-----|
| Rochelle salt                                     | 297       | $2 \leftrightarrow 222$                       | 1920       | 1   |
| Tri-glycine sulfate (TGS)                         | 322       | $2 \leftrightarrow 2/m$                       | 1957       | 2   |
| Triglycine fluoberyllate (TGFB)                   | 352       | $2 \leftrightarrow 2/m$                       | 1962, 1976 | 3   |
| Pyridinium perrhenate                             | 333       | $mm2 \leftrightarrow \text{---}$              | 1997       | 4   |
| Hdabco perchlorate                                | 377       | $mm2 \leftrightarrow 4/mmm$                   | 1999, 2016 | 5   |
| Hdabco tetrafluoroborate                          | 374       | $mm2 \leftrightarrow 4/mmm$                   | 1999, 2017 | 6   |
| Hdabco perrhenate                                 | 377, 500  | $m \leftrightarrow 4mm \leftrightarrow m-3m$  | 2017       | 7   |
| Guanidinium perchlorate                           | 454       | $3m \leftrightarrow m-3m$                     | 2011, 2017 | 8   |
| Tetraethylammonium perchlorate                    | 378       | $m \leftrightarrow m-3m$                      | 2016       | 9   |
| Quinuclidinium periodate                          | 322       | $mm2 \leftrightarrow m-3m$                    | 2017       | 10  |
| Quinuclidinium perrhenate                         | 345, 367  | $mm2 \leftrightarrow 3m \leftrightarrow m-3m$ | 2017       | 11  |
| [D-55DMBP][Hia]                                   | 268       | $1 \leftrightarrow -1$                        | 2007       | 12  |
| [D-55DMBP][Dia]                                   | 335       | $1 \leftrightarrow -1$                        | 2007       | 12  |
| Bis(imidazolium) L-Tartrate                       | 351       | $2 \leftrightarrow 222$                       | 2012       | 13  |
| [H-dppz][Hca]                                     | 402       | $m \leftrightarrow 2/m$                       | 2013       | 14  |
| Diisopropylammonium Chloride                      | 440       | $2 \leftrightarrow 2/m$                       | 2011       | 15  |
| Diisopropylammonium Bromide                       | 426       | $2 \leftrightarrow 2/m$                       | 2013       | 16  |
| [Me-dabco]- $\text{NH}_4\text{I}_3$               | 448       | $3 \leftrightarrow 432$                       | 2018       | 17  |
| Cyclohexylammonium-(18-crown-6)- perchlorate      | 390       | $mm2 \leftrightarrow mmm$                     | 2015       | 18  |
| Cyclohexylammonium-(18-crown-6)-tetrafluoroborate | 397       | $mm2 \leftrightarrow mmm$                     | 2015       | 18  |
| (R)-(-)-3 hydroxyquinuclidinium Chloride          | 340       | $4 \leftrightarrow 432$                       | 2016       | 19  |
| Pyridinium periodate                              | 321       | $mm2 \leftrightarrow mmm$                     | 2001       | 20  |
| Imidazolium periodate                             | 310       | $2 \leftrightarrow 2/m$                       | 2014       | 21  |
| Acetamidinium perchlorate                         | 320       | $2 \leftrightarrow m-3m$                      | 2018       | 22  |

|                                                          |            |                                               |             |                  |
|----------------------------------------------------------|------------|-----------------------------------------------|-------------|------------------|
| Bromocholine bromide                                     | 329        | $2 \leftrightarrow 2/m$                       | 2018        | 23               |
| $[\text{C}(\text{NH}_2)_3]_4\text{Cl}_2\text{SO}_4$      | 356        | $mm2 \leftrightarrow -42m$                    | 2005        | 24               |
| $[\text{C}(\text{NH}_2)_3]_4\text{Br}_2\text{SO}_4$      | 365.5      | $mm2 \leftrightarrow -42m$                    | 2006        | 25               |
| $\alpha$ -[H-6,6'-dmbp][Hca]                             | 380        | $2 \leftrightarrow \text{---}$                | 2014        | 26               |
| Imidazolium perchlorate                                  | 373        | $3m \leftrightarrow -3m$                      | 2014        | 27               |
| <b>[9-tacn-3]Cl<sub>2</sub>[BF<sub>4</sub>]</b>          | <b>400</b> | <b><math>2 \leftrightarrow 6/mmm</math></b>   | <b>2019</b> | <b>This work</b> |
| $[\text{CN}_4\text{H}_8]\text{ZrF}_6$                    | 383        | $mm2 \leftrightarrow mmm$                     | 2001        | 28               |
| $[\text{Et}_3\text{MeN}][\text{FeBr}_4]$                 | 171, 360   | $6 \leftrightarrow 6mm \leftrightarrow 6/mmm$ | 2012        | 29               |
| $[\text{MeNH}_3]_5\text{Bi}_2\text{Cl}_{11}$             | 250, 307   | $2 \leftrightarrow mm2 \leftrightarrow mmm$   | 1989        | 30               |
| $[\text{MeNH}_3]_5\text{Bi}_2\text{Br}_{11}$             | 312        | $mm2 \leftrightarrow mmm$                     | 1989        | 31               |
| $[\text{Me}_2\text{NH}]_3\text{Sb}_2\text{Cl}_9$         | 242        | $\text{---} \leftrightarrow 2/m$              | 1986        | 32               |
| TMCM-MnCl <sub>3</sub>                                   | 406        | $m \leftrightarrow 6/mmm$                     | 2017        | 33               |
| [Cyclopentylaminium][CdCl <sub>3</sub> ]                 | 300        | $m \leftrightarrow mmm$                       | 2014        | 34               |
| [3-Pyrrolinium][CdCl <sub>3</sub> ]                      | 316        | $mm2 \leftrightarrow mmm$                     | 2014        | 35               |
| (Cyclohexylammonium) <sub>2</sub> PbBr <sub>4</sub>      | 363        | $mm2 \leftrightarrow mmm$                     | 2016        | 36               |
| [3-Pyrrolinium][MnCl <sub>3</sub> ]                      | 376        | $mm2 \leftrightarrow mmm$                     | 2015        | 37               |
| $[(\text{CH}_3)_3\text{NCH}_2\text{Br}]_2\text{-ZnBr}_4$ | 387        | $2/m \leftrightarrow mmm$                     | 2018        | 38               |
| <i>Conventional ferroelectrics</i>                       |            |                                               |             |                  |
| HCl                                                      | 98         | $mm2 \leftrightarrow$ (cubic)                 | 1967        | 39               |
| KH <sub>2</sub> PO <sub>4</sub> (KDP)                    | 123        | $mm2 \leftrightarrow -42m$                    | 1935        | 40               |
| (NH <sub>4</sub> )HSO <sub>4</sub>                       | 270, 154   | $1 \leftrightarrow m \leftrightarrow 2/m$     | 1958        | 41               |
| PVDF                                                     | —          | $mm2 \leftrightarrow \text{---}$              | 1974        | 42               |
| SbSI                                                     | 295        | $mm2 \leftrightarrow mmm$                     | 1962        | 43               |
| BaTiO <sub>3</sub>                                       | 393        | $4mm \leftrightarrow m-3m$                    | 1944        | 44               |
| NaNO <sub>2</sub>                                        | 436        | $mm2 \leftrightarrow mmm$                     | 1958        | 45               |
| KNbO <sub>3</sub>                                        | 708        | $4mm \leftrightarrow m-3m$                    | 1951        | 46               |
| SrTeO <sub>3</sub>                                       | 585, 758   | $m \leftrightarrow \text{---}$                | 1967, 1973  | 47               |
| PbTiO <sub>3</sub>                                       | 763        | $4mm \leftrightarrow m-3m$                    | 1950        | 48               |
| LiTaO <sub>3</sub>                                       | 938        | $3m \leftrightarrow -3m$                      | 1949        | 49               |
| BiFeO <sub>3</sub>                                       | 1123       | $3m \leftrightarrow m-3m$                     | 1969        | 50               |
| LiNbO <sub>3</sub>                                       | 1483       | $3m \leftrightarrow -3m$                      | 1949        | 49               |

Table S2 Crystal data and structure refinement for **1** at 298 K and 413 K.

|                          | 298 K                                                                         | 413 K                                                                         |
|--------------------------|-------------------------------------------------------------------------------|-------------------------------------------------------------------------------|
| Empirical formula        | C <sub>6</sub> H <sub>18</sub> N <sub>3</sub> F <sub>4</sub> BCl <sub>2</sub> | C <sub>6</sub> H <sub>18</sub> N <sub>3</sub> F <sub>4</sub> BCl <sub>2</sub> |
| Formula weight           | 289.94                                                                        | 289.94                                                                        |
| Crystal system           | Monoclinic                                                                    | Hexagonal                                                                     |
| Space group              | $P2_1$                                                                        | $P6_3/mmc$                                                                    |
| $a$ (Å)                  | 8.0679(2)                                                                     | 8.1276(7)                                                                     |
| $b$ (Å)                  | 10.5006(3)                                                                    | 8.1276(7)                                                                     |
| $c$ (Å)                  | 14.0399(4)                                                                    | 10.5327(13)                                                                   |
| $\alpha$ (deg)           | 90                                                                            | 90                                                                            |
| $\beta$ (deg)            | 90.802(2)                                                                     | 90                                                                            |
| $\gamma$ (deg)           | 90                                                                            | 120                                                                           |
| Volume (Å <sup>3</sup> ) | 1189.31(6)                                                                    | 602.55(13)                                                                    |

|                                          |               |               |
|------------------------------------------|---------------|---------------|
| $Z, D_{\text{calcd}} / \text{g cm}^{-3}$ | 4, 1.619      | 2, 1.598      |
| $\mu$ (mm <sup>-1</sup> )                | 0.574         | 0.567         |
| $F(000)$                                 | 600           | 300           |
| Goodness-of-fit on $F^2$                 | 1.000         | 1.959         |
| $T_{\text{min}}/T_{\text{max}}$          | 0.861 / 0.856 | 0.863 / 0.858 |
| Flack parameter                          | 0.06(2)       | -             |
| $R_1^a$ ( $> 2\sigma$ )                  | 0.0324        | 0.1161        |
| $wR_2^b$ ( $> 2\sigma$ )                 | 0.0800        | 0.3897        |

$$^a R_1 = \sum ||F_o| - |F_c|| / \sum |F_o|, \quad ^b wR_2 = [\sum (|F_o|^2 - |F_c|^2) / \sum |F_o|^2]^{1/2}$$

Table S3 Bond lengths [Å] and angles [°] for **1** at 298 K.

|                |          |                  |          |
|----------------|----------|------------------|----------|
| B(1)-F(3)      | 1.370(5) | B(2)-F(5)        | 1.373(4) |
| B(1)-F(2)      | 1.372(4) | B(2)-F(8)        | 1.374(5) |
| B(1)-F(4)      | 1.381(5) | B(2)-F(7)        | 1.388(5) |
| B(1)-F(1)      | 1.397(4) | B(2)-F(6)        | 1.393(4) |
| C(1)-N(1)      | 1.491(4) | C(7)-C(8)        | 1.502(5) |
| C(1)-C(2)      | 1.507(5) | C(7)-N(4)        | 1.507(4) |
| C(2)-N(2)      | 1.499(4) | C(8)-N(5)        | 1.495(4) |
| C(3)-N(2)      | 1.497(4) | C(9)-N(5)        | 1.506(4) |
| C(3)-C(4)      | 1.513(4) | C(9)-C(10)       | 1.513(4) |
| C(4)-N(3)      | 1.514(4) | C(10)-N(6)       | 1.501(4) |
| C(5)-N(3)      | 1.499(4) | C(11)-N(6)       | 1.502(4) |
| C(5)-C(6)      | 1.511(5) | C(11)-C(12)      | 1.516(4) |
| C(6)-N(1)      | 1.502(4) | C(12)-N(4)       | 1.494(4) |
| F(3)-B(1)-F(2) | 110.0(3) | F(5)-B(2)-F(8)   | 112.0(3) |
| F(3)-B(1)-F(4) | 112.3(3) | F(5)-B(2)-F(7)   | 109.5(3) |
| F(2)-B(1)-F(4) | 109.3(3) | F(8)-B(2)-F(7)   | 109.5(3) |
| F(3)-B(1)-F(1) | 109.3(3) | F(5)-B(2)-F(6)   | 110.0(3) |
| F(2)-B(1)-F(1) | 106.4(3) | F(8)-B(2)-F(6)   | 109.1(3) |
| F(4)-B(1)-F(1) | 109.4(3) | F(7)-B(2)-F(6)   | 106.7(3) |
| N(1)-C(1)-C(2) | 115.8(3) | N(5)-C(8)-C(7)   | 115.7(2) |
| N(2)-C(2)-C(1) | 114.9(3) | N(5)-C(9)-C(10)  | 115.7(2) |
| N(2)-C(3)-C(4) | 115.4(3) | N(6)-C(10)-C(9)  | 116.4(3) |
| N(3)-C(5)-C(6) | 117.3(3) | N(6)-C(11)-C(12) | 116.7(2) |
| N(1)-C(6)-C(5) | 116.1(3) | N(4)-C(12)-C(11) | 114.7(3) |
| C(3)-C(4)-N(3) | 116.8(3) | C(8)-C(7)-N(4)   | 114.4(3) |
| C(1)-N(1)-C(6) | 116.8(3) | C(12)-N(4)-C(7)  | 115.7(2) |
| C(3)-N(2)-C(2) | 114.8(2) | C(8)-N(5)-C(9)   | 115.0(2) |
| C(5)-N(3)-C(4) | 117.2(2) | C(10)-N(6)-C(11) | 116.3(2) |

Table S4 Hydrogen bonds parameters for **1** at 298 K.

| D-H...A              | D-H  | H...A | D...A    | $\angle$ D-H...A |
|----------------------|------|-------|----------|------------------|
| N(1)-H(1A)...Cl(4)#1 | 0.89 | 2.37  | 3.216(3) | 157.7            |
| N(1)-H(1B)...Cl(3)   | 0.89 | 2.31  | 3.148(3) | 156.6            |
| N(2)-H(2A)...Cl(2)#2 | 0.89 | 2.40  | 3.234(3) | 155.6            |



|                      |      |      |          |       |
|----------------------|------|------|----------|-------|
| N(2)-H(2B)...Cl(3)   | 0.89 | 2.29 | 3.179(3) | 173.4 |
| N(3)-H(3A)...Cl(4)#3 | 0.89 | 2.35 | 3.205(3) | 160.6 |
| N(3)-H(3B)...Cl(1)#4 | 0.89 | 2.32 | 3.165(3) | 158.8 |
| N(4)-H(4C)...Cl(2)   | 0.89 | 2.25 | 3.135(3) | 171.4 |
| N(4)-H(4D)...Cl(1)#5 | 0.89 | 2.34 | 3.180(3) | 158.5 |
| N(5)-H(5C)...Cl(2)   | 0.89 | 2.39 | 3.187(3) | 149.6 |
| N(5)-H(5D)...Cl(3)   | 0.89 | 2.35 | 3.202(3) | 159.1 |
| N(6)-H(6C)...Cl(4)#4 | 0.89 | 2.25 | 3.116(2) | 163.2 |
| N(6)-H(6D)...Cl(1)#6 | 0.89 | 2.35 | 3.161(3) | 151.3 |

Symmetry transformations used to generate equivalent atoms : #1 -x+1,y-1/2,-z+1; #2 x-1,y,z;

#3 x,y-1,z; #4 x+1,y,z; #5 -x+1,y+1/2,-z; #6 x+1,y+1,z.

Table S5 Weak Hydrogen bonds parameters for **1** at 298 K.

| D-H...A               | D-H  | H...A | D...A    | ∠D-H...A |
|-----------------------|------|-------|----------|----------|
| C(1)-H(1C)...F(2)#1   | 0.97 | 2.34  | 3.242(4) | 153.9    |
| C(1)-H(1C)...F(4)#1   | 0.97 | 2.63  | 3.384(5) | 134.8    |
| C(1)-H(1D)...F(1)#2   | 0.97 | 2.52  | 3.098(4) | 118.2    |
| C(2)-H(2D)...F(1)#2   | 0.97 | 2.51  | 3.188(4) | 127.2    |
| C(3)-H(3C)...F(7)#3   | 0.97 | 2.53  | 3.233(4) | 128.8    |
| C(3)-H(3D)...F(8)#4   | 0.97 | 2.61  | 3.341(4) | 132.0    |
| C(4)-H(4B)...F(6)#3   | 0.97 | 2.55  | 3.330(4) | 137.0    |
| C(5)-H(5B)...F(2)#5   | 0.97 | 2.52  | 3.240(4) | 131.1    |
| C(6)-H(6B)...F(1)#5   | 0.97 | 2.59  | 3.367(4) | 137.6    |
| C(7)-H(7B)...F(6)     | 0.97 | 2.46  | 3.144(4) | 127.0    |
| C(8)-H(8A)...F(6)     | 0.97 | 2.49  | 3.078(4) | 118.9    |
| C(8)-H(8B)...F(7)#3   | 0.97 | 2.38  | 3.263(4) | 150.8    |
| C(8)-H(8B)...F(8)#3   | 0.97 | 2.51  | 3.259(4) | 134.2    |
| C(9)-H(9A)...F(1)     | 0.97 | 2.46  | 3.035(4) | 117.3    |
| C(9)-H(9A)...F(2)#6   | 0.97 | 2.42  | 3.031(4) | 120.7    |
| C(10)-H(10A)...F(3)#6 | 0.97 | 2.51  | 3.475(4) | 170.9    |
| C(11)-H(11B)...F(6)#7 | 0.97 | 2.47  | 3.031(4) | 116.9    |
| C(11)-H(11B)...F(7)#8 | 0.97 | 2.44  | 3.015(4) | 118.0    |
| C(12)-H(12B)...F(5)#8 | 0.97 | 2.55  | 3.513(5) | 171.3    |
| C(2)-H(2C)...Cl(4)#4  | 0.97 | 2.72  | 3.681(3) | 170.5    |
| C(4)-H(4A)...Cl(3)    | 0.97 | 2.78  | 3.639(3) | 147.4    |
| C(6)-H(6A)...Cl(4)#4  | 0.97 | 2.80  | 3.651(3) | 146.6    |
| C(7)-H(7A)...Cl(1)#9  | 0.97 | 2.88  | 3.838(3) | 171.8    |
| C(9)-H(9B)...Cl(1)#9  | 0.97 | 2.75  | 3.574(3) | 142.7    |
| C(11)-H(11A)...Cl(2)  | 0.97 | 2.74  | 3.592(3) | 147.6    |

Symmetry transformations used to generate equivalent atoms : #1 x-1,y,z; #2 -x+1,y-1/2,-z+1; #4 x,y-1,z;

#3 -x+1,y-1/2,-z; #5 -x+2,y-1/2,-z+1; #6 -x+2,y+1/2,-z+1; #7 x+1,y,z; #8 -x+2,y-1/2,-z; #9 x+1,y+1,z.

## References and Notes

1. J. Valasek, *Phys. Rev.*, 1921, **17**, 475.
2. S. Hoshino, T. Mitsui, F. Jona and R. Pepinsky, *Phys. Rev.*, 1957, **107**, 1255.
3. (a) F. Jona and G. Shirane, *Pergamon Press*, New York 1962; (b) T. Mitsui, I. Tatsuzaki and E. Nakamura, *Gordon and Breach Science Publishers*, New York 1976.
4. J. Wąsicki, P. Czarnecki, Z. Pająk, W. Nawrocik and W. Szczepański, *J. Chem. Phys.* 1997, **107**, 576.
5. (a) A. Katrusiak and M. Szafrąński, *Phys. Rev. Lett.* 1999, **82**, 576; (b) Y. Y. Tang, W. Y. Zhang, P. F. Li, H. Y. Ye, Y. M. You and Xiong, R. G., *J. Am. Chem. Soc.* 2016, **138**, 15784.
6. P. P. Shi, Y. Y. Tang, P. F. Li, H. Y. Ye and R.-G. Xiong, *J. Am. Chem. Soc.*, 2017, **139**, 1319.
7. Y. Y. Tang, P. F. Li, W. Y. Zhang, H. Y. Ye, Y. M. You and R. G. Xiong, *J. Am. Chem. Soc.*, 2017, **139**, 13903.
8. (a) M. Szafrąński, *J. Phys. Chem. B* 2011, **115**, 8755; (b) Q. Pan, Z. B. Liu, H. Y. Zhang, W. Y. Zhang, Y. Y. Tang, Y. M. You, P. F. Li, W. Q. Liao, P. P. Shi, R. W. Ma, R. Y. Wei and R. G. Xiong, *Adv. Mater.*, 2017, **29**, 1700831.
9. H. Y. Ye, J. Z. Ge, Y. Y. Tang, P. F. Li, Y. Zhang, Y. M. You and R. G. Xiong, *J. Am. Chem. Soc.* 2016, **138**, 13175.
10. Y. M. You, Y. Y. Tang, P. F. Li, H. Y. Zhang, W. Y. Zhang, Y. Zhang, H. Y. Ye, T. Nakamura and R. G. Xiong, *Nat. Commun.* 2017, **8**, 14934.
11. Y. Y. Tang, P. F. Li, P. P. Shi, W. Y. Zhang, Z. X. Wang, Y. M. You, H. Y. Ye, T. Nakamura and R. G. Xiong, *Phys. Rev. Lett.* 2017, **119**, 207602.
12. S. Horiuchi, R. Kumai and Y. Tokura, *Angew. Chem. Int. Ed.*, 2007, **46**, 3497.
13. Z. Sun, T. Chen, J. Luo and M. Hong, *Angew. Chem. Int. Ed.*, 2012, **51**, 3871.
14. S. Horiuchi, R. Kumai and Y. Tokura, *J. Am. Chem. Soc.*, 2013, **135**, 4492.
15. D. W. Fu, W. Zhang, H. L. Cai, J. Z. Ge, Y. Zhang and R. G. Xiong, *Adv. Mater.*, 2011, **23**, 5658.
16. D. W. Fu, H. L. Cai, Y. Liu, Q. Ye, W. Zhang, Y. Zhang, X. Y. Chen, G. Giovannetti, M. Capone, J. Li and R. G. Xiong, *Science*, 2013, **339**, 425.
17. H. Y. Ye, Y. Y. Tang, P. F. Li, W. Q. Liao, J. X. Gao, X. N. Hua, H. Cai, P. P. Shi, Y. M. You and R. G. Xiong, *Science*, 2018, **361**, 151.
18. Y. Z. Tang, Y. M. Yu, J. B. Xiong, Y. H. Tan and H. R. Wen, *J. Am. Chem. Soc.*, 2015, **137**, 13345.
19. P. F. Li, Y. Y. Tang, Z. X. Wang, H. Y. Ye, Y. M. You and R. G. Xiong, *Nat. Commun.*, 2016, **7**, 13635.
20. H. Maluszynska, P. Czarnecki, S. Lewicki, J. Wasicki and M. Gdaniec, *J. Phys. Condens. Matter*, 2001, **13**, 11053.
21. Y. Zhang, H. Y. Ye, H. L. Cai, D. W. Fu, Q. Ye, W. Zhang, Q. Zhou, J. Wang, G. L. Yuan and R. G. Xiong, *Adv. Mater.*, 2014, **26**, 4515.
22. W. J. Xu, Y. Zeng, W. Yuan, R. G. Qiu, W. X. Zhang and X. M. Chen, *Chem. Commun.*, 2018, **54**, 3347.
23. S. S. Wang, X. X. Chen, B. Huang, Y. J. Su, W. X. Zhang, M. H. Zeng and X. M. Chen, *J. Mater. Chem. C*, 2018, **6**, 2221.
24. M. Szafrąński, *Phys. Rev. B*, 2005, **72**, 054122.
25. M. Szafrąński and A. Katrusiak, *Phys. Rev. B*, 2006, **73**, 134111.

26. F. Kagawa, S. Horiuchi, N. Minami, S. Ishibashi, K. Kobayashi, R. Kumai, Y. Murakami and Y. Tokura, *Nano Lett.*, 2014, **14**, 239.
27. Y. Zhang, Y. Liu, H. Y. Ye, D. W. Fu, W. Gao, H. Ma, Z. Liu, Y. Liu, W. Zhang, J. Li, G. L. Yuan and R. G. Xiong, *Angew. Chem. Int. Ed.*, 2014, **53**, 5064.
28. M. Bauer, D. Pugmire, B. Paulsen, R. Christie, D. Arbogast, C. Gallagher, W. Raveane, R. Nielson, C. Ross II, P. Photinos and S. C. Abrahams, *J. Appl. Crystallogr.*, 2001, **34**, 47.
29. H. L. Cai, Y. Zhang, D. W. Fu, W. Zhang, T. Liu, H. Yoshikawa, K. Awaga and R. G. Xiong, *J. Am. Chem. Soc.*, 2012, **134**, 18487.
30. (a) R. Jakubas, L. Sobczyk and J. Lefebvre, *Ferroelectrics*, 1989, **100**, 143; (b) P. Szklarz, M. Gałazka, P. Zieliński and G. Bator, *Phys. Rev. B*, 2006, **74**, 184111.
31. R. Jakubas, *Solid State Commun.*, 1989, **69**, 267.
32. (a) R. Jakubas, *Solid State Commun.*, 1986, **60**, 389; (b) G. Bator and R. Jakubas, *Phys. Status Solidi A Appl. Res.*, 1995, **147**, 591.
33. Y. M. You, W. Q. Liao, D. Zhao, H. Y. Ye, Y. Zhang, Q. Zhou, X. Niu, J. Wang, P. F. Li, D. W. Fu, Z. Wang, S. Gao, K. Yang, J. M. Liu, J. Li, Y. Yan and R. G. Xiong, *Science*, 2017, **357**, 306.
34. Y. Zhang, H. Y. Ye, W. Zhang and R. G. Xiong, *Inorg. Chem. Front.*, 2014, **1**, 118.
35. H. Y. Ye, Y. Zhang, D. W. Fu and R. G. Xiong, *Angew. Chem. Int. Ed.*, 2014, **53**, 11242.
36. H. Y. Ye, W. Q. Liao, C. L. Hu, Y. Zhang, Y. M. You, J. G. Mao, P. F. Li and R. G. Xiong, *Adv. Mater.*, 2016, **28**, 2579.
37. H. Y. Ye, Q. Zhou, X. Niu, W. Q. Liao, D. W. Fu, Y. Zhang, Y. M. You, J. Wang, Z. N. Chen and R. G. Xiong, *J. Am. Chem. Soc.*, 2015, **137**, 13148.
38. J. X. Gao, X. N. Hua, P. F. Li, X. G. Chen and W. Q. Liao, *J. Phys. Chem. C*, 2018, **122**, 23111.
39. S. Hoshino, K. Shimaoka and N. Niimura, *Phys. Rev. Lett.*, 1967, **19**, 1286.
40. G. H. Haertling, *J. Am. Ceram. Soc.*, 1999, **82**, 797.
41. J. L. Birman, *Phys. Rev.*, 1958, **111**, 1510.
42. (a) S. B. Lang and S. Muensit, *Appl. Phys. A*, 2006, **85**, 125; (b) P. Ueberschlag, *Sens. Rev.*, 2001, **21**, 118.
43. E. Fatuzzo, G. Harbeke, W. J. Merz, R. Nitsche, H. Roetschi and W. Ruppel, *Phys. Rev.*, 1962, **127**, 2036.
44. (a) G. Arlt, D. Hennings and G. De With, *J. appl. Phys.*, 1985, **58**, 1619; (b) S. Horiuchi and Y. Tokura, *Nat. Mater.*, 2008, **7**, 357.
45. S. Sawada, S. Nomura, S. i. Fujii and I. Yoshida, *Phys. Rev. Lett.*, 1958, **1**, 320.
46. B. T. Matthias and J. P. Remeika, *Phys. Rev.*, 1951, **82**, 727.
47. T. Yamada and H. Iwasaki, *Appl. Phys. Lett.*, 1972, **21**, 89.
48. G. Shirane, S. Hoshino and K. Suzuki, *Phys. Rev.*, 1950, **80**, 1105.
49. B. T. Matthias and J. P. Remeika, *Phys. Rev.*, 1949, **76**, 1886.
50. C. Michel, J. M. Moreau, G. D. Achenbach, R. Gerson and W. J. James, *Solid State Commun.*, 1969, **7**, 701.
